# Supplementary material for: An iRGD peptide conjugated heparin nanocarrier for gastric cancer therapy
Source: Royal Society of Chemistry journal article supplement (doi:10.1039/c8ra05071f), 2018-01-01
Supplement: c8ra05071f1.pdf [file c8ra05071f1.pdf]

# An iRGD peptide conjugated heparin nanocarrier for gastric cancer therapy

Shichao Ai,<sup>a</sup> Shuang Zhen,<sup>c</sup> Zhijian Liu,<sup>a</sup> Feng Sun,<sup>a</sup> Xingchen He,<sup>b</sup> Feng Chu,<sup>b</sup>  
Wenxian Guan\*<sup>a</sup> and Jianquan Wang\*<sup>b</sup>

<sup>a</sup> Department of General Surgery, Drum Tower Hospital, Medical School of Nanjing University, Nanjing, Jiangsu 210008, China.

<sup>b</sup> Department of Biomedical Engineering, College of Engineering and Applied Sciences, Nanjing University, Nanjing, Jiangsu Province 210093, China.

<sup>c</sup> Department of General Surgery, Jinling Hospital, Medical School of Nanjing University, Nanjing, China

\*corresponding: medguanwx@163.com; wangjianquan006@163.com

A:

Heparin-COOH D2O

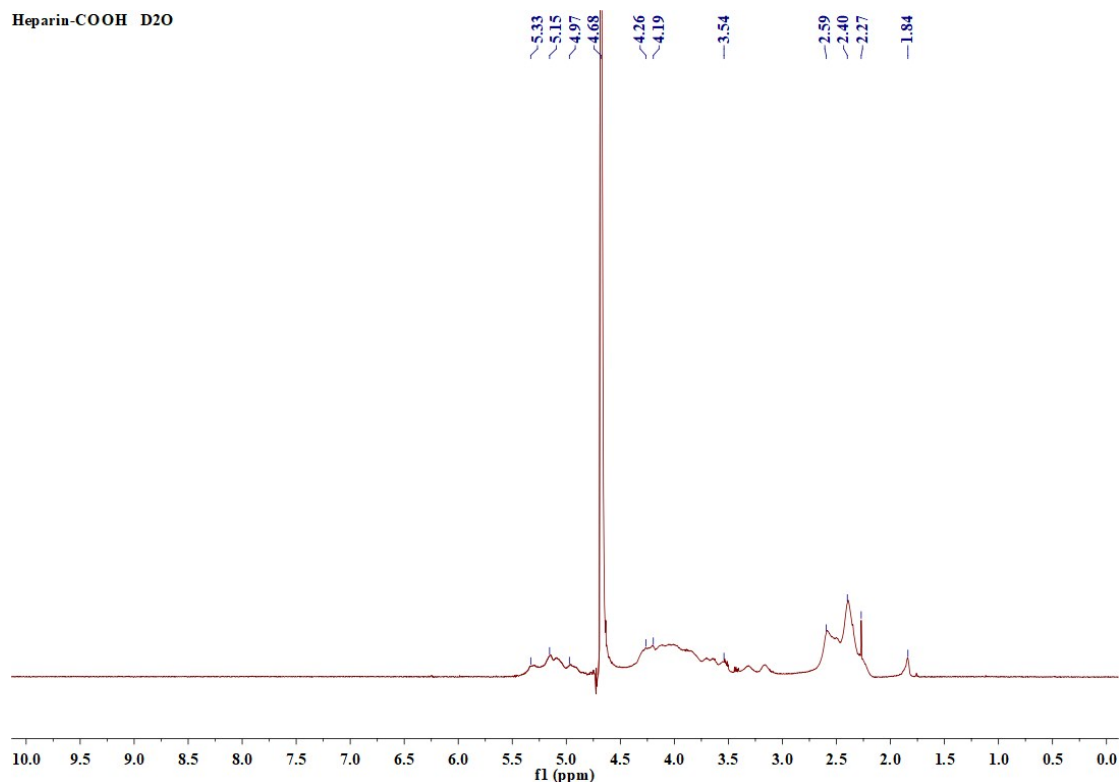

B:

iRGD-Heparin

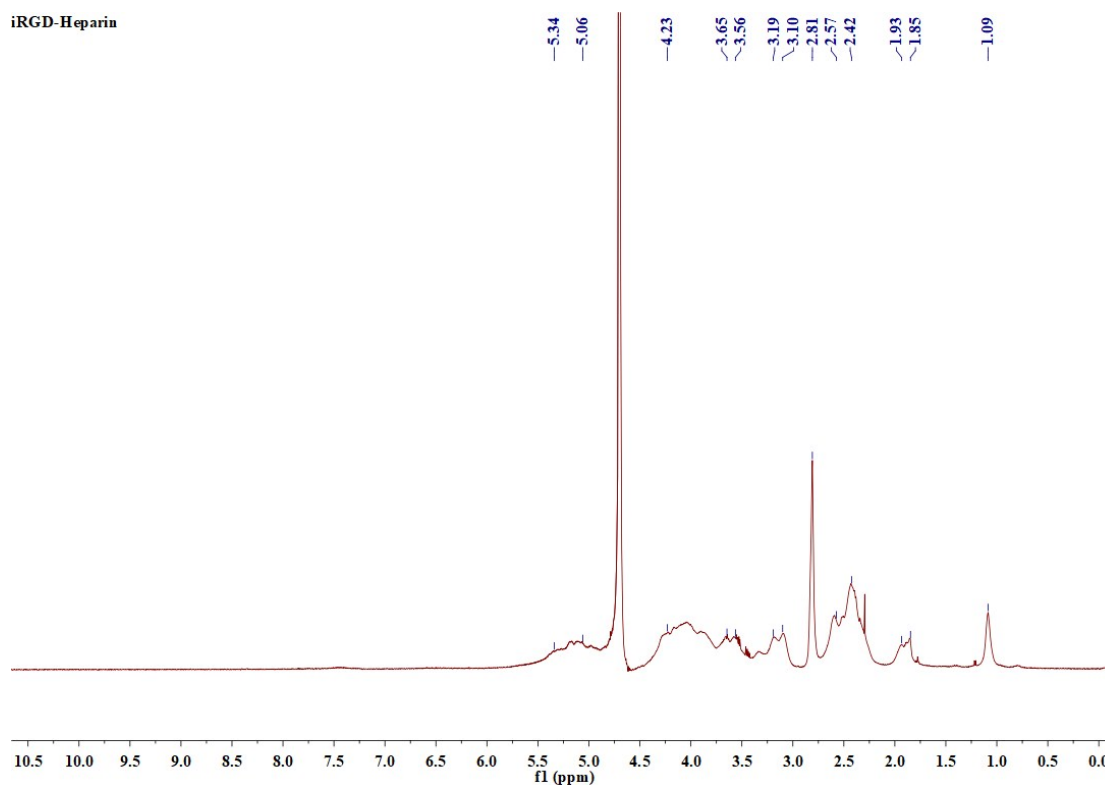

Fig. S1: A: The NMR of H-Su: 4.97-5.33ppm (heparin), 3.54-4.26 ppm (heparin) and 2.27-2.59ppm (-CH<sub>2</sub>CH<sub>2</sub>-COOH, H-Su); B: The NMR of iRGD-HP: 5.06-5.34 ppm (heparin), 3.56-4.23 ppm (heparin), 2.42-2.81 ppm (-CH<sub>2</sub>CH<sub>2</sub>-CONH-, iRGD-HP), 2.81ppm (iRGD), 1.09 ppm (iRGD).

|      | PBS   | UFH   | iHP   | Reference Ranges |
|------|-------|-------|-------|------------------|
| PT   | 12.3s | 13.0s | 12.2s | 9-13s            |
| APTT | 31.2s | 57.3s | 36.7s | 20-40s           |
| TT   | 16.0s | ***** | 33.6s | 14-21s           |

Table. S1: Anticoagulant function evaluation of PBS, iHP and UFH. (“\*\*\*\*\*” means exceeding the reference range greatly)
